# Supplementary material
Source: Springer Nature journal article supplement (https://www.springermedizin.de/resource/supplementary/12877_2007_95_MOESM5_ESM.pdf/9441176)

Anaemia (%) by WHO criteria in each age group

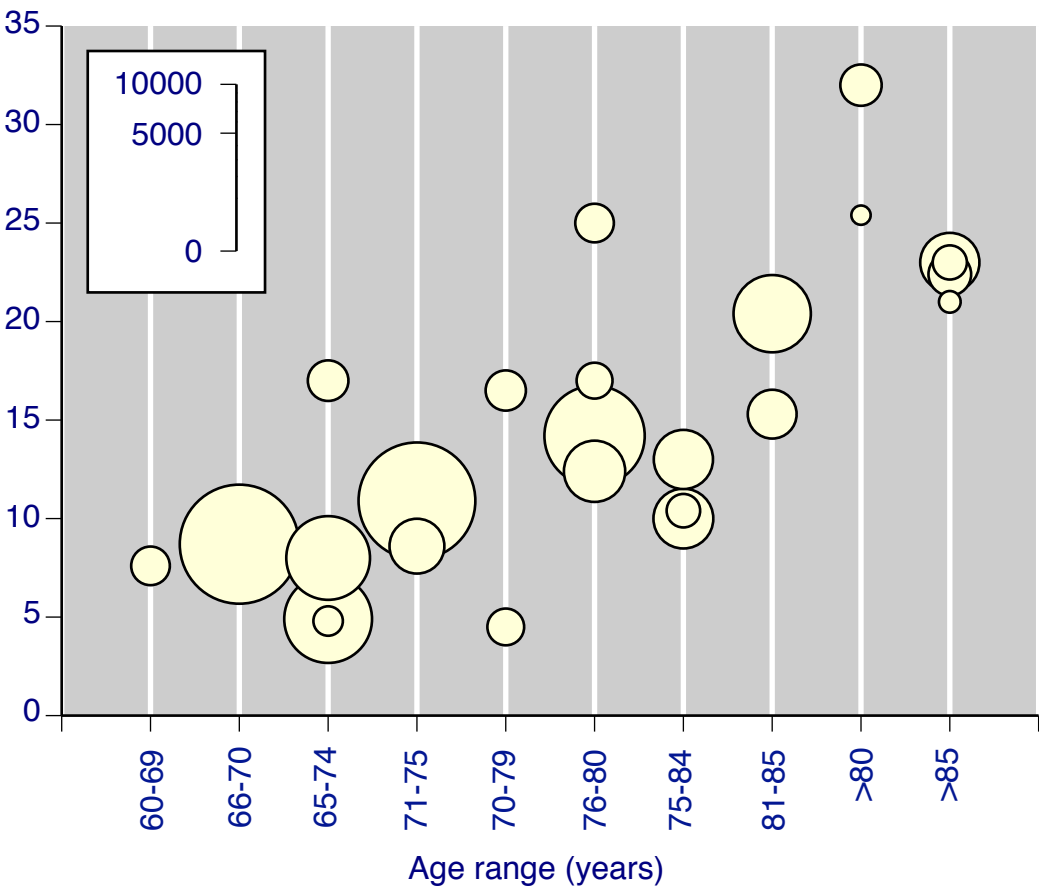

Supplement: MOESM5 [file 9441176]
